# Supplementary figures and images for: First Fully Endoscopic End-to-End Colonic Anastomoses With a Novel Endoscopic Device: A Feasibility Study in a Porcine Model
Source: PubMed Central journal article supplement — Dis Colon Rectum. 2024 Sep 10;67(12):1584–91. doi: 10.1097/DCR.0000000000003486 (PMC11575899; doi:10.1097/dcr.0000000000003486), 2024-09-10

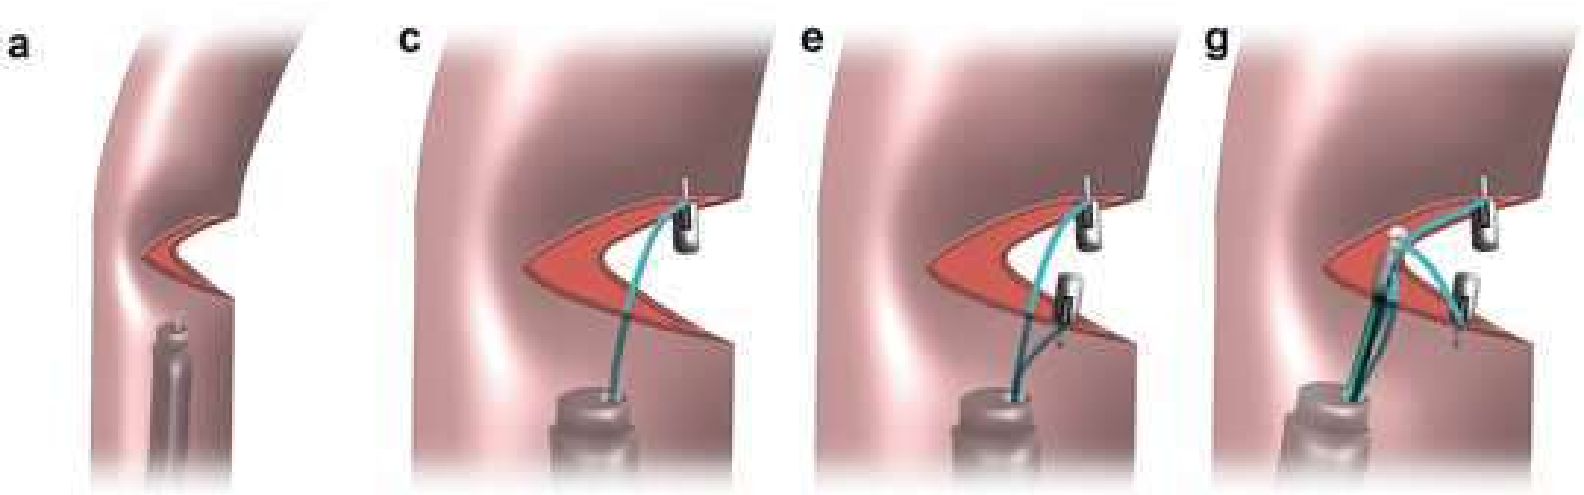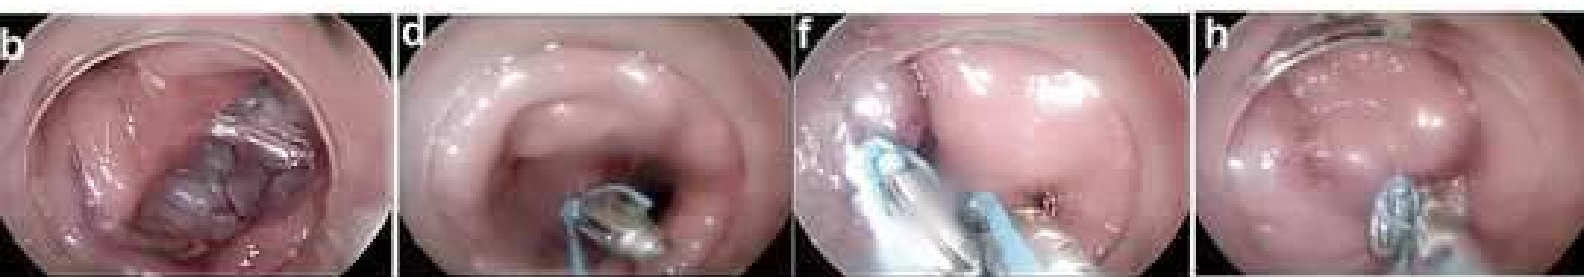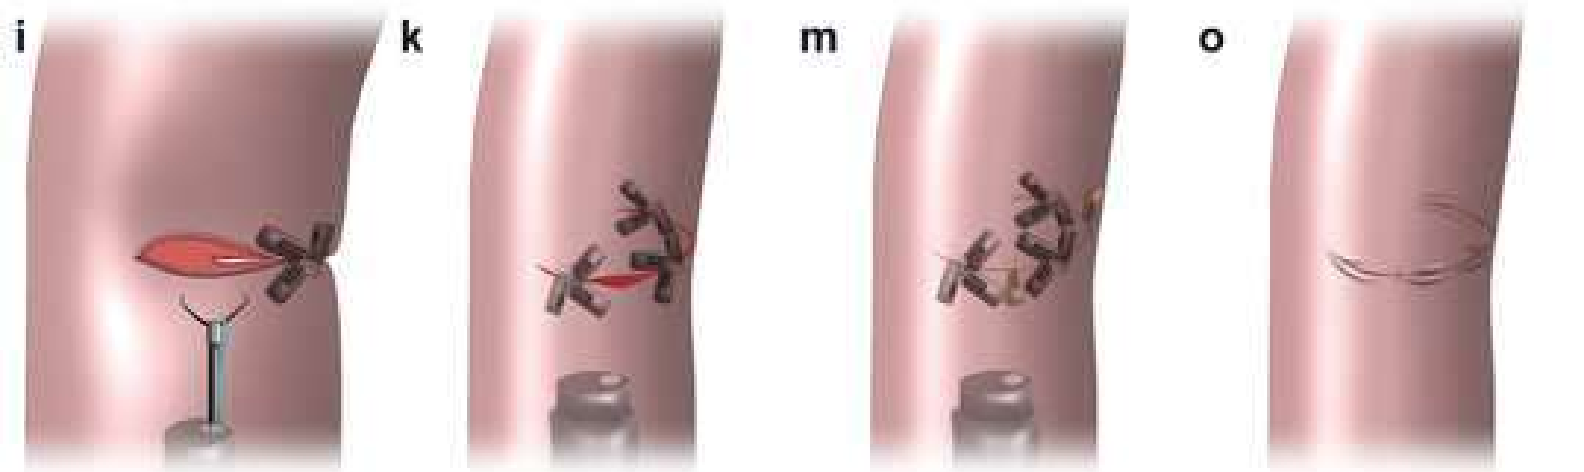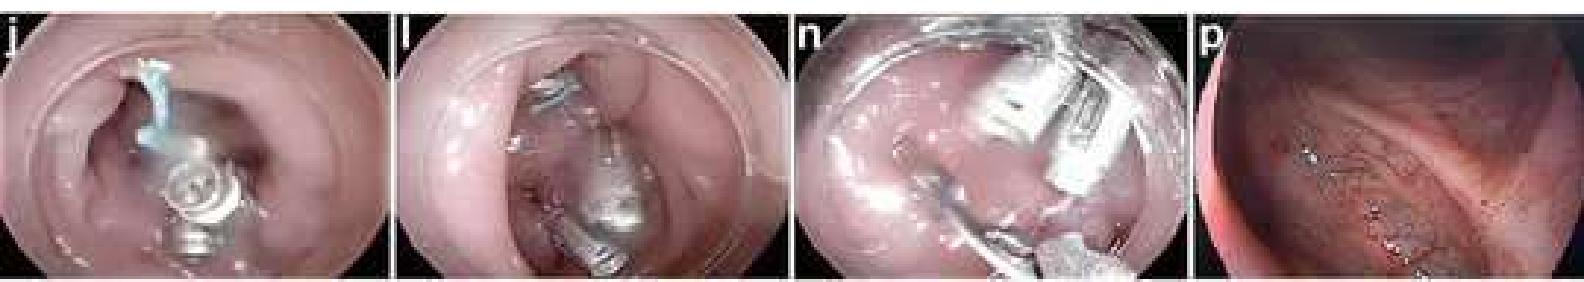

Supplement: dcr-67-1584-s002.pdf [file dcr-67-1584-s002.pdf]

### Procedure time of end-to-end anastomosis

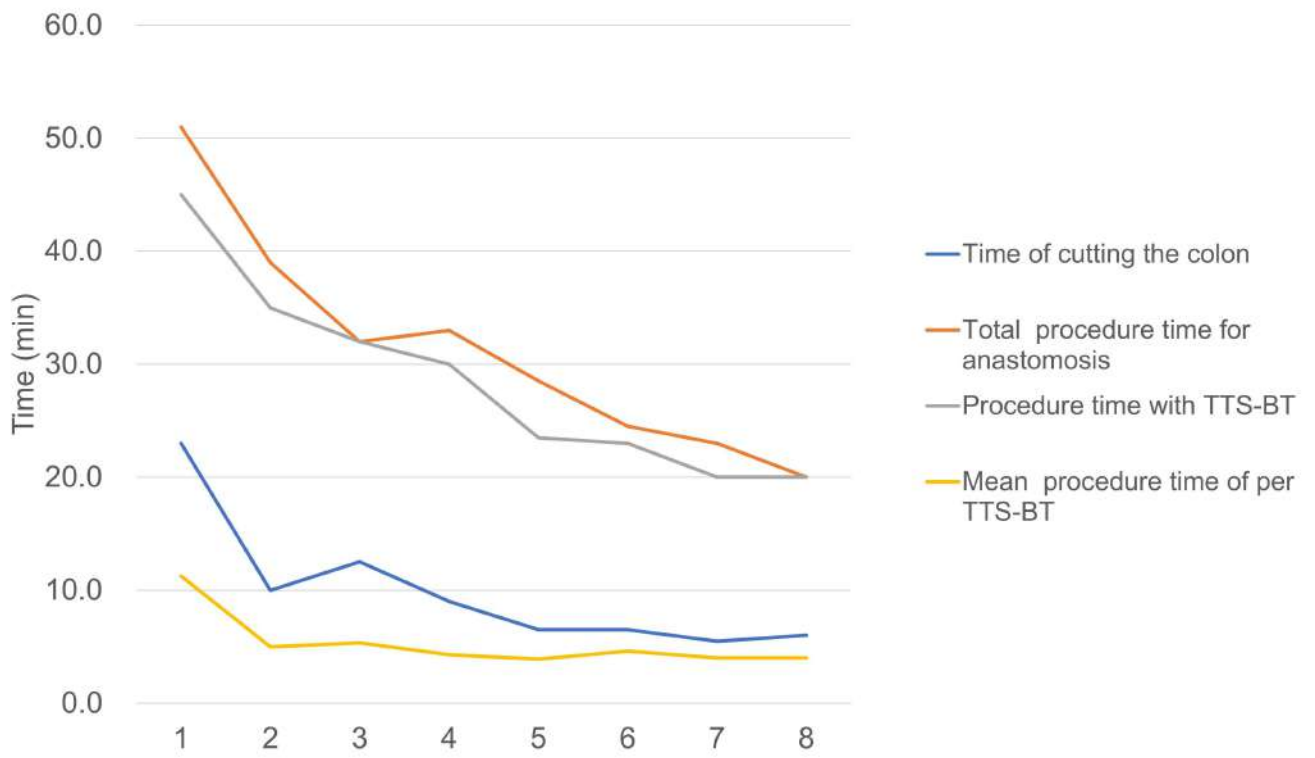

Supplement: dcr-67-1584-s003.pdf [file dcr-67-1584-s003.pdf]

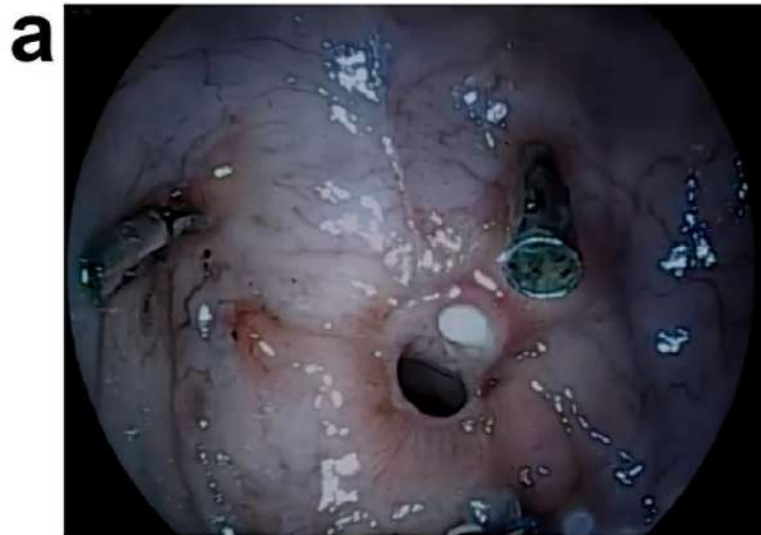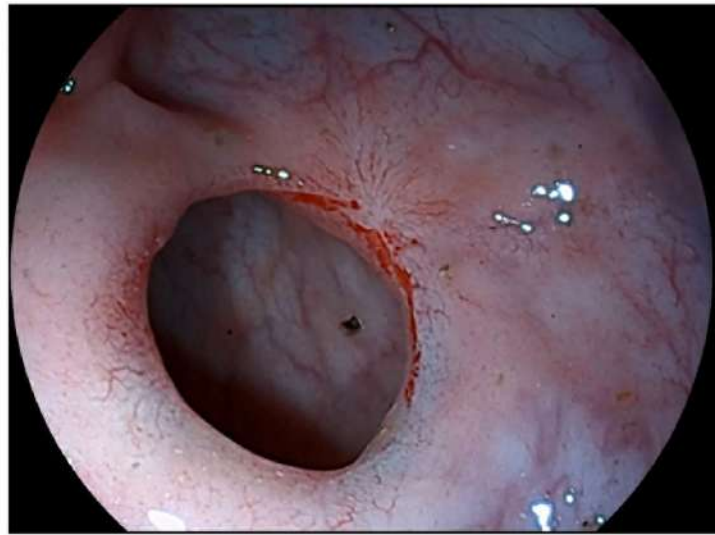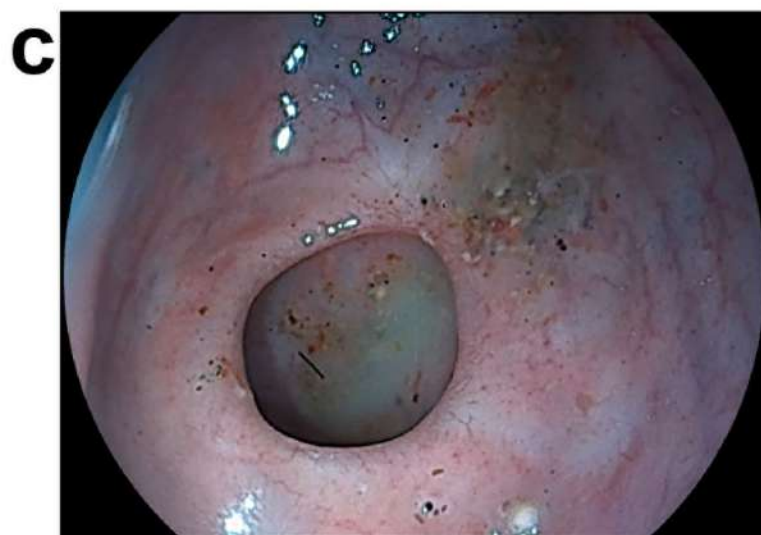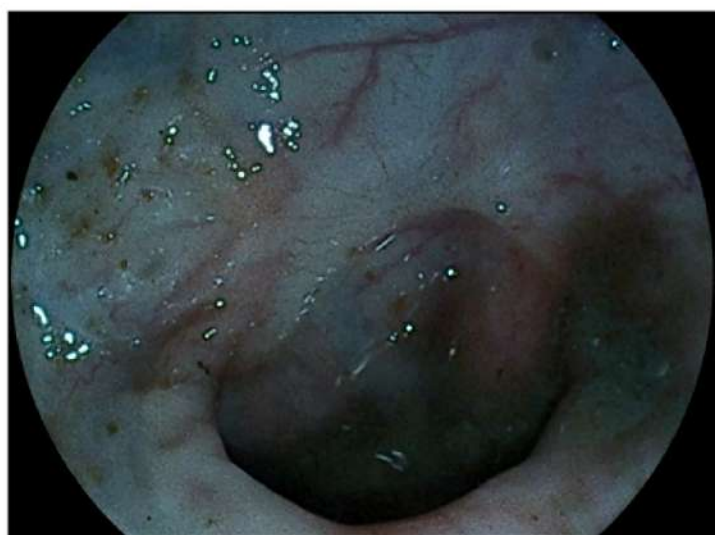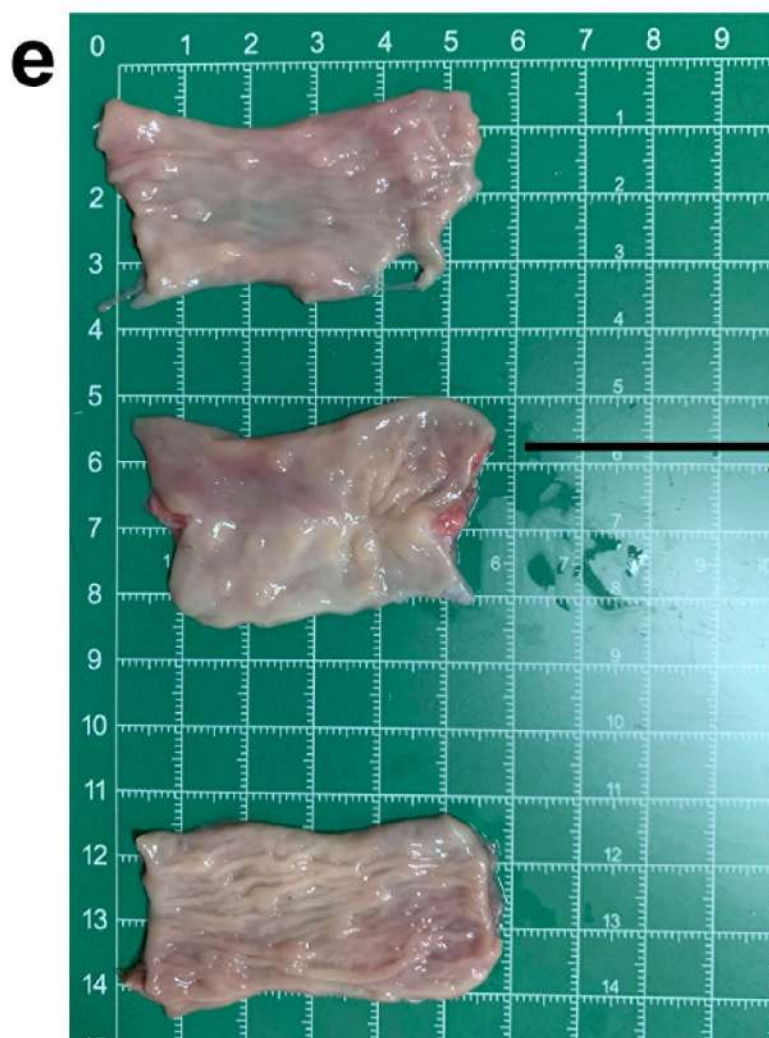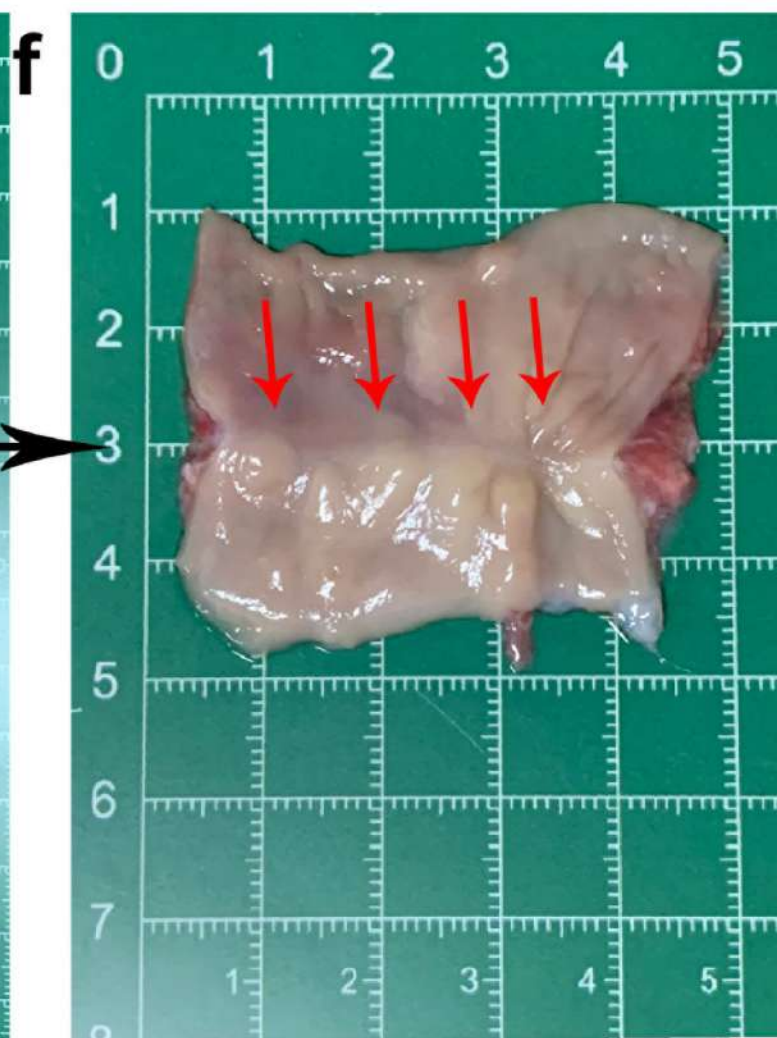

Supplement: dcr-67-1584-s004.pdf [file dcr-67-1584-s004.pdf]
